# Supplementary material for: Product distribution, kinetics, and aerosol formation from the OH oxidation of dimethyl sulfide under different RO 2 regimes
Source: Copernicus journal article supplement (doi:10.5194/acp-22-16003-2022), 2022-12-20
Supplement: Supplementary file [file acp-22-16003-2022-supplement.pdf]

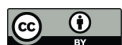

*Supplement of*

## **Product distribution, kinetics, and aerosol formation from the OH oxidation of dimethyl sulfide under different RO<sub>2</sub> regimes**

**Qing Ye et al.**

*Correspondence to:* Qing Ye ([qingye@ucar.edu](mailto:qingye@ucar.edu)) and Jesse H. Kroll ([jhkroll@mit.edu](mailto:jhkroll@mit.edu))

The copyright of individual parts of the supplement might differ from the article licence.

## 1. Reaction mechanisms used in the box model

The full DMS + OH reaction scheme used in the box model is presented in Figure 1. Reactions added to the default sulfur chemistry currently in MCMv3.3.1 are given in Table S1.

**Table S1: Reactions added to the default sulfur chemistry in MCMv3.3.1.** (Jenkin et al., 1997; Saunders et al., 2003) **in the box model**

| Gas-phase reactions                                                                                            | $k^a$                                             | References                                              |
|----------------------------------------------------------------------------------------------------------------|---------------------------------------------------|---------------------------------------------------------|
| $\text{CH}_3\text{SCH}_2\text{OO} \rightarrow \text{OOCH}_2\text{SCH}_2\text{OOH}$ (isomerization)             | 0.09                                              | Ye <i>et al.</i> 2021                                   |
| $\text{OOCH}_2\text{SCH}_2\text{OOH} \rightarrow \text{HOCH}_2\text{SCHO} + \text{OH}$                         | $5.8 \times 10^{11} \exp(-10155/T + 1080200/T^2)$ | Wu <i>et al.</i> 2015                                   |
| $\text{OOCH}_2\text{SCH}_2\text{OOH} + \text{NO} \rightarrow \text{OCH}_2\text{SCH}_2\text{OOH} + \text{NO}_2$ | $4.9 \times 10^{-12} \exp(260/T)$                 | Same as $\text{CH}_3\text{SCH}_2\text{OO}$ in MCMv3.3.1 |
| $\text{OOCH}_2\text{SCH}_2\text{OOH} + \text{HO}_2 \rightarrow \text{HOCH}_2\text{SCH}_2\text{OOH}$            | $1.13 \times 10^{-12} \exp(1300/T)$               | Same as $\text{CH}_3\text{SCH}_2\text{OO}$ in MCMv3.3.1 |
| $\text{OCH}_2\text{SCH}_2\text{OOH} \rightarrow \text{SCH}_2\text{OOH} + \text{HCHO}$                          | $1 \times 10^6$                                   | Same as $\text{CH}_3\text{SCH}_2\text{O}$ in MCMv3.3.1  |
| $\text{HOCH}_2\text{SCHO} + \text{OH} \rightarrow \text{HOCH}_2\text{SCO}$                                     | $1.0 \times 10^{-11}$                             | Vermeuel <i>et al.</i> 2020                             |
| $\text{HOCH}_2\text{SCO} \rightarrow \text{CO} + \text{HOCH}_2\text{S}$                                        | $9.2 \times 10^9 \exp(-505.4/T)$                  | Wu <i>et al.</i> 2015                                   |
| $\text{HOCH}_2\text{SCO} \rightarrow \text{OH} + \text{HCHO} + \text{OCS}$                                     | $1.6 \times 10^7 \exp(-1468.6/T)$                 | Wu <i>et al.</i> 2015                                   |
| $\text{HOCH}_2\text{S} + \text{NO}_2 \rightarrow \text{HOCH}_2\text{SO} + \text{NO}$                           | $6.0 \times 10^{-11} \exp(240/T)$                 | Same as $\text{CH}_3\text{S}$ in MCMv3.3.1              |
| $\text{HOCH}_2\text{S} + \text{O}_3 \rightarrow \text{HOCH}_2\text{SO} + \text{O}_2$                           | $1.15 \times 10^{-12} \exp(430/T)$                | Same as $\text{CH}_3\text{S}$ in MCMv3.3.1              |
| $\text{HOCH}_2\text{SO} + \text{O}_3 \rightarrow \text{SO}_2 + \text{HCHO} + \text{OH} + \text{O}_2$           | $4.0 \times 10^{-13}$                             | Same as $\text{CH}_3\text{SO}$ in MCMv3.3.1             |
| $\text{HOCH}_2\text{SO} + \text{NO}_2 \rightarrow \text{SO}_2 + \text{HCHO} + \text{OH} + \text{NO}$           | $1.2 \times 10^{-11}$                             | Same as $\text{CH}_3\text{SO}$ in MCMv3.3.1             |

a: The units of  $k$  are  $\text{s}^{-1}$  for unimolecular reactions and  $\text{cm}^3 \text{molec}^{-1} \text{s}^{-1}$  for bimolecular reactions.

## 2. Instruments

Table S2: S-containing products detected and the corresponding instruments

| Formula detected (not including reagent ions) | Assigned species                                 | Vocus PTR-MS | I-CIMS | $\text{NH}_4^+$ -CIMS | AMS | Compact TILDAS |
|-----------------------------------------------|--------------------------------------------------|--------------|--------|-----------------------|-----|----------------|
| $\text{C}_2\text{H}_6\text{S}$                | Dimethyl sulfide                                 | ✓            |        |                       |     |                |
| $\text{C}_2\text{H}_6\text{SO}$               | Dimethyl sulfoxide                               | ✓            |        | ✓                     |     |                |
| $\text{C}_2\text{H}_6\text{SO}_2$             | Dimethyl sulfone, Methylthiomethyl hydroperoxide | ✓            |        | ✓                     |     |                |
| $\text{C}_2\text{H}_4\text{SO}$               | Methylthioformate                                | ✓            |        | ✓                     |     |                |
| $\text{CH}_4\text{SO}_2$                      | Methanesulfinic acid                             | ✓            | ✓      | ✓                     |     |                |
| $\text{C}_2\text{H}_4\text{SO}_3$             | Hydroperoxymethyl thioformate                    |              | ✓      | ✓                     |     |                |

|                                                                                   |                                 |  |   |  |   |   |
|-----------------------------------------------------------------------------------|---------------------------------|--|---|--|---|---|
| CH <sub>3</sub> SO <sub>6</sub> N                                                 | Methanesulfonyl peroxyxynitrate |  | ✓ |  |   |   |
| CH <sub>2</sub> SO <sub>2</sub>                                                   | Thioacid                        |  | ✓ |  |   |   |
| CH <sub>3</sub> SO <sub>2</sub> <sup>+</sup> etc                                  | Methane sulfonic acid           |  |   |  | ✓ |   |
| SO <sup>+</sup> , SO <sub>2</sub> <sup>+</sup> , SO <sub>3</sub> <sup>+</sup> etc | Sulfuric acid/Sulfate aerosol   |  |   |  | ✓ |   |
|                                                                                   | Sulfur dioxide                  |  |   |  |   | ✓ |

## 2.1 Vocus PTR-MS measurements

A Vocus Proton-Transfer-Reaction Time-of-Flight Mass Spectrometer (Vocus PTR-MS, Aerodyne Research Inc.) was used to measure the precursor and lightly oxygenated products from the oxidation (see Table S1) with sub-ppt detection limits (Krechmer et al., 2018). The instrument details are documented in Krechmer *et al.* (Krechmer et al., 2018). Reaction mixtures were directly sampled from the chamber at 1 slpm and measured at 1 Hz frequency. The compounds in the mixtures were ionized by proton transfer reactions with the hydronium ion (H<sub>3</sub>O<sup>+</sup>) and detected as M•H<sup>+</sup>.

The sensitivity of the Vocus PTR-MS to a wide range of compounds was calibrated using two methods. In the first method, the instrument sampled a flow of calibration gas from a cylinder that contained 5 ppb of an array of compounds including acetone, benzene,  $\alpha$ -pinene and several other VOCs. This calibration was performed every 4 hours during the experiments. In the second calibration, a liquid calibration system was used to generate known amounts of species that were expected to form in the experiments including DMSO and DMSO<sub>2</sub>, by quantitatively evaporating the solution containing the compounds of known concentrations into a stream of ultra-zero air that was sampled by the instrument. By varying the concentration of the solution, a four-point calibration was conducted, denoted as the reference sensitivity for DMSO and DMSO<sub>2</sub>, S<sub>DMSO\_ref</sub> and S<sub>DMSO2\_ref</sub>. The second type of calibration was conducted two times during the middle of the chamber campaign, and the sensitivities to DMSO and DMSO<sub>2</sub> were averaged between the two calibrations. The sensitivity uncertainty of DMSO and DMSO<sub>2</sub> was determined to be 10% and 3%, respectively, by taking the standard deviation of the sensitivities derived from the two calibrations. Acetone sensitivity using the calibration gas was also calibrated during the second calibration, denoted as S<sub>acetone\_ref</sub>. The instrument sensitivity may vary over time, and therefore, the sensitivity of DMSO (and similarly DMSO<sub>2</sub>) in every experiment was derived by scaling the acetone reference sensitivity:

$$S_{\text{DMSO\_exp}} = S_{\text{DMSO\_ref}} \times \frac{S_{\text{acetone\_exp}}}{S_{\text{acetone\_ref}}}$$

## 2.2 I-CIMS measurements

An Iodide Time-of-Flight Chemical Ionization Mass Spectrometer (I-CIMS) was used to measure more oxidized species in the reaction mixture. A <sup>210</sup>Po strip (10 mCi, NRD LLC) was used to ionize methyl iodide vapor from a permeation tube forming I<sup>-</sup> as the reagent ions. A 1.8 slpm sample flow taken from the chamber was mixed with a 2 slpm humidified N<sub>2</sub> flow carrying the reagent ions in the ion–molecule reactor.

To calibrate and constrain the sensitivity of the I-CIMS to a broad range of compounds including products in DMS oxidation, calibrations using authentic standards and the voltage scanning technique (Isaacman-VanWertz et al., 2018; Lopez-Hilfiker et al., 2016) were used. First, the sensitivity of N<sub>2</sub>O<sub>5</sub> which represents the maximum sensitivity of the instrument was determined. A known amount of N<sub>2</sub>O<sub>5</sub> was formed in the chamber under dry condition by injecting 1-5 ppb of O<sub>3</sub> into the chamber prefilled with 1-2 ppm of NO<sub>2</sub>:

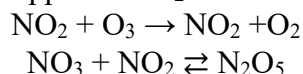

Each addition of O<sub>3</sub> was allowed to equilibrate until the N<sub>2</sub>O<sub>5</sub>•I<sup>-</sup> signal was stable. The total measured signals of N<sub>2</sub>O<sub>5</sub> by the I-CIMS included N<sub>2</sub>O<sub>5</sub>I<sup>-</sup> and NO<sub>3</sub><sup>-</sup> ions (Lopez-Hilfiker et al., 2016). Multiple O<sub>3</sub> additions were conducted to derive a multi-point calibration, and the N<sub>2</sub>O<sub>5</sub> concentration in the chamber was calculated using the F0AM model. The derived N<sub>2</sub>O<sub>5</sub> sensitivity is 12 cps ppt<sup>-1</sup> (normalized to 10<sup>6</sup> cps reagent ions).

The sensitivities of several organic acids were also calibrated by using the liquid calibration system. Similar to the calibration of Vocus PTR-MS, known concentrations of calibrants were delivered to the I-CIMS for a multipoint calibration by quickly evaporating the solution containing the calibrants in the liquid calibration system. Voltage scanning was performed during the calibration by changing the voltage between the skimmer and big segment quadrupole to examine the binding energy of the iodide-molecule adduct, denoted as dV50, the voltage at which 50% of the adduct declustered (Isaacman-VanWertz et al., 2018; Lopez-Hilfiker et al., 2016).

Figure S1 shows the relationship between the measured sensitivity and dV50 for compounds calibrated. It is known that succinic acid is measured close to the maximum instrument sensitivity and therefore, it is determined that species with a dV50 ~5V or greater will be detected at the maximum sensitivity. Voltage scanning was also performed every two hours in every experiment for all species measured. Based on the voltage scanning results, the sensitivities of sulfur-containing products were estimated: dV50 for CH<sub>4</sub>SO<sub>3</sub> (MSA), CH<sub>2</sub>SO<sub>2</sub> (thioacid or sulfene) and CH<sub>3</sub>SO<sub>6</sub>N (methanesulfonyl peroxyxynitrate) were 4.7 V, 5.4 V and 9.4 V, respectively; their sensitivities were therefore estimated to be 12 cps ppt<sup>-1</sup>. The dV50 for C<sub>2</sub>H<sub>4</sub>SO<sub>3</sub> (HPMTF) and CH<sub>4</sub>SO<sub>2</sub> (MSIA) were 2.6 V and 2.7 V, respectively, close to the dV50 of HONO, and their sensitivities were estimated to be the same as HONO, 1.0 cps ppt<sup>-1</sup>.

There are substantial uncertainties for the estimated sensitivities using voltage scanning. Therefore, in Section 3.3 in which the yield of HPMTF was calculated to derive the isomerization rate coefficient (*k*<sub>isom</sub>) of the CH<sub>3</sub>SCH<sub>2</sub>OO radical, a calibration factor was included (Eq. S1 and Eq. S4). However, the fitting in Figure 3(a) is only sensitive to the shape of the curve, and not the absolute value. This helps minimize the effect of uncertainty of the HPMTF calibration on the determination of *k*<sub>isom</sub>. Note that in dry experiments, good sulfur closure measurements were obtained from data collected by independently calibrated instruments, and the asymptote value in Figure 3a is close to 1 (1.5), suggesting that our estimated sensitivities were reasonable. To estimate the overall uncertainty in the sulfur closure, a 50% relative standard deviation was applied to individual species measured by the I-CIMS.

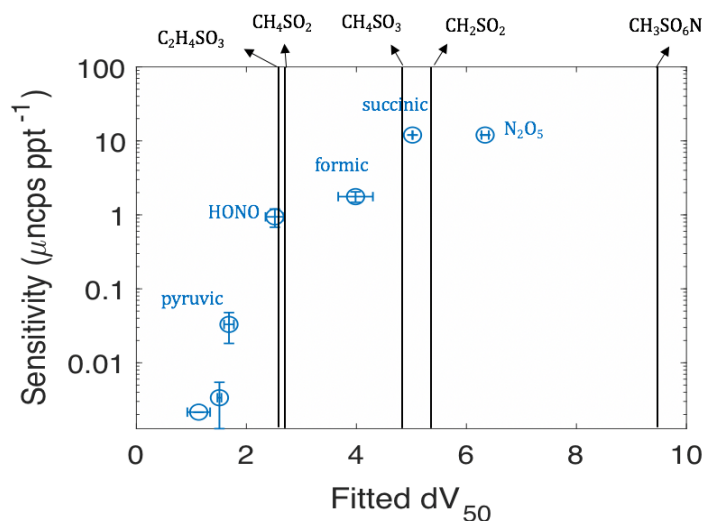

Figure S1: I-CIMS sensitivity of  $\text{N}_2\text{O}_5$  and organic acids versus their iodide cluster disassociation voltage derived from voltage scanning. The sensitivities of the sulfur-containing products are determined as the following:  $S_{\text{C}_2\text{H}_4\text{SO}_3} = 1 \text{ cps ppt}^{-1}$ ,  $S_{\text{CH}_4\text{SO}_2} = 1 \text{ cps ppt}^{-1}$ ,  $S_{\text{CH}_4\text{SO}_3} = 12 \text{ cps ppt}^{-1}$ ,  $S_{\text{CH}_2\text{SO}_2} = 12 \text{ cps ppt}^{-1}$ ,  $S_{\text{CH}_3\text{SO}_6\text{N}} = 12 \text{ cps ppt}^{-1}$ , normalized to  $10^6 \text{ cps}$  reagent ions.

### 2.3 $\text{NH}_4^+$ -CIMS measurements

A time-of-flight chemical ionization mass spectrometer which used ammonium ( $\text{NH}_4^+$ ) as the reagent ion ( $\text{NH}_4^+$ -CIMS) was also deployed to measured oxygenated products (Zaytsev et al., 2019). Table S2 lists the sulfur-containing species by the  $\text{NH}_4^+$ -CIMS. The instrument uses a  $\frac{1}{4}$ " PFA Teflon sampling line with a flow of 3.5 slpm. The instrument is designed to minimize inlet losses of sampled compounds. The dominant reagent ions are  $\text{NH}_4^+(\text{H}_2\text{O})_n$ , ( $n = 0, 1, 2$ ), and chemical species are detected as ammonium-clusters  $\text{NH}_4^+(\text{M})$  through ligand-switching reactions.

Unlike the I-CIMS, the  $\text{NH}_4^+$ -CIMS detects HPMTF without the interference from  $\text{N}_2\text{O}_5$ . Figure S2 illustrates that the  $\text{C}_2\text{H}_4\text{SO}_3$ - $^{12}\text{C}_2$  signal measured by both instruments show a consistent time series in Exp. 2a. This confirms that there is negligible  $\text{N}_2\text{O}_5$  interference in the I-CIMS measurements of HPMTF used in the total-sulfur analysis.

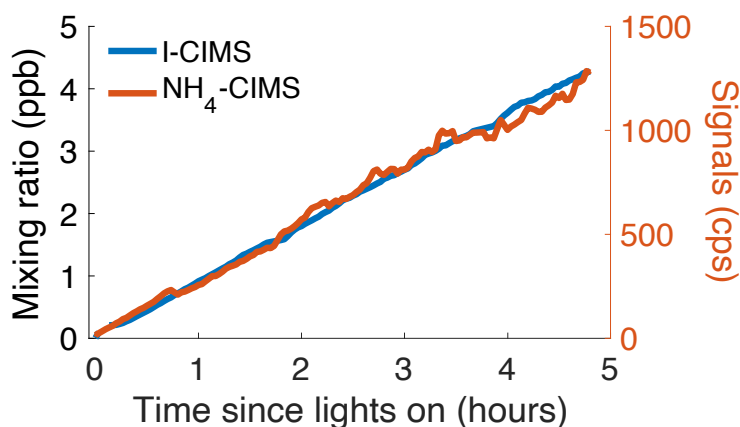

Figure S2: Time series of  $C_2H_4SO_3$  (from  $DMS-^{12}C_2$ ) measured by the I-CIMS and the  $NH_4^+$ -CIMS in Exp. 2a.

#### 2.4. Aerodyne Compact Tunable Infrared Laser Direct Absorption Spectrometer (TILDAS)

The  $SO_2$  concentration was measured using an Aerodyne Compact Tunable Infrared Laser Direct Absorption Spectrometer (TILDAS) (McManus et al., 2011; McManus et al., 1995). The single-laser instrument measured  $SO_2$  absorptions near  $1352\text{ cm}^{-1}$ , in a 76-m astigmatic multipass absorption cell (AMAC) (McManus et al., 1995). The continuous wave laser was rapidly scanned at kHz rates, and resulting spectra were averaged every second and fit on-the-fly using on board software (TDLWintel). Typical 1-s noise levels were 160 ppt, averaging to  $< 40$  ppt in 100 seconds. The instrument was zeroed every 5 minutes using ultra-zero air, and calibrated using a 5.1 ppm standard diluted into an ultra-zero air overflow from 0-1000 ppb.

#### 2.5 Particle-phase measurements using the aerosol mass spectrometer

##### *Calibration and raw data analysis*

The aerosol mass spectrometer (AMS) was calibrated for ionization efficiency using ammonium nitrate. Relative ionization efficiencies (RIE) for  $NH_4^+$  (3.96),  $SO_4^{2-}$  (0.92), and MSA (1.20) were calculated using  $NH_4NO_3$ ,  $NH_4SO_4$ , and  $NH_4(CH_3SO_3)$  using the ammonium balance method (Hodshire et al., 2019).

Quantification of MSA was performed using SQUIRREL 1.63B and PIKA 1.23B based on the method published by Huang *et al.*, 2017 (Huang et al., 2017), where the total mass of MSA is based on a reference spectrum and the distinctive fragment  $CH_3SO_2^+$ . Since MSA fragmentation has been shown to vary based on instrumental factors (Zorn et al., 2008), a pure MSA spectrum for our instrument was taken from MSA aerosolized into the chamber. The reference spectrum was obtained by summing the high-resolution families that contribute to the MSA spectrum (CHOgt1, CHO1, CH, CS,  $C_x$ , SO, HS) and removing others (such as NH) that result from trace ammonia in the chamber/sampling lines. No significant ions except for  $CH_3SO_2^+$  were observed at  $m/z$  79 in high resolution analysis during the experiments so the entire unit mass was assigned to this ion.

Particles containing  $DMSO_2$  were also generated by atomizing a  $DMSO_2$  solution and was directly introduced to the AMS. However, no aerosol signals were observed. This is probably because  $DMSO_2$  is volatile to semi-volatile (Scholz et al., 2022) and therefore evaporated when entering the chamber. As a result, no aerosol-phase reference spectrum of  $DMSO_2$  was obtained. It is expected that at least in the dry experiments,  $DMSO_2$  stayed in the gas-phase and did not contribute to the  $CH_3SO_2^+$  fragment in the AMS.

For Experiment 4 when the AMS was operated at  $800\text{ }^\circ\text{C}$ , a reference spectrum for MSA taken at  $800\text{ }^\circ\text{C}$  was used instead. The fragmentation table in SQUIRREL 1.63B was adjusted according to the reference spectrum.

For experiments in which both  $^{12}C$ - and  $^{13}C$ -DMS were used, this method was modified to account for both isotopes. A reference  $^{13}C$ -MSA spectrum was first derived from the  $^{12}C$ -MSA spectrum by inspection—based on which ions contain carbon—since no pure sample is easily available. Next, the  $^{12}C / ^{13}C$  isotope ratio, which remained constant throughout each experiment, was derived based on high resolution fitting at  $m/z$  96 and  $m/z$  97 where few ions interfered with the  $^{12}CH_4SO_3^+$

and  $^{13}\text{CH}_4\text{SO}_3^+$  signals. The key peak for  $^{13}\text{C}$ -MSA ( $^{13}\text{CH}_3\text{SO}_2^+$ ) was easily distinguished from  $\text{SO}_3^+$  in high resolution and the ratio of these ions was used to calculate the total  $^{13}\text{C}$ -MSA mass using the reference spectrum and the unit mass resolution frag table. The signal from the key peak for  $^{12}\text{C}$ -MSA ( $^{12}\text{CH}_3\text{SO}_2^+$ ) is estimated based on the  $^{12}\text{C} / ^{13}\text{C}$  isotope ratio and the  $^{13}\text{CH}_3\text{SO}_2^+$  signal; total  $^{12}\text{C}$ -MSA mass is then calculated as above based on the derived  $^{12}\text{CH}_3\text{SO}_2^+$  signal.

### *Corrections*

Particle wall loss was accounted for when estimating the concentration of aerosol-phase products. Particle wall loss rate was expected to be faster during the beginning of the experiment and gradually decreased as the experiment proceeds due to the growth of the particles. The estimate of particle wall loss rate was performed by measuring the loss rate of particle containing 2:1 mix of  $\text{H}_2\text{SO}_4$  and MSA by aerosolizing the solution containing the mixture into the chamber. This particle composition roughly matched that of the observed products. AMS results corrected by this single mass-based wall loss rate coefficient were taken as the “best estimate”, which was  $5.74 \times 10^{-5} \text{ s}^{-1}$ , and was applied for wall loss correction for entire experiments based on Wang *et al.* (Wang *et al.*, 2018). Upper ( $1.59 \times 10^{-4} \text{ s}^{-1}$ ) and lower ( $4.58 \times 10^{-5} \text{ s}^{-1}$ ) bounds for this wall loss correction were additionally calculated based on the faster average loss rate of the  $\text{NaNO}_3$  seed particles and the slower average rate at the end of experimental particle losses, respectively. Particle mass concentrations calculated using the upper and lower bounds of wall loss correction were included in the overall uncertainty of the sulfur closure.

Additionally, due to the presence of some particles below the optimal AMS transmission size range, a small correction to the total AMS mass was applied based on the SMPS size distribution and the AMS transmission efficiency curve (Guo *et al.*, 2021), under the assumption that these particles had the same chemical composition. This was done by calculating and correcting for the fraction of the SMPS signal that would not be detected by the AMS. This correction increased calculated mass by an average of 2%. During high-RH experiments, a diffusion dryer was placed upstream of aerosol measurements to remove effects of RH in particle quantifications. By combining the AMS and SMPS data from experiments with a high aerosol yield, the AMS collection efficiency (CE) was estimated assuming spherical particles without voids. The CE for Exp. 1 was estimated to be  $\sim 0.5$ , consistent with the previous DMS study published from our group (Ye *et al.*, 2021). The CE for Exp. 4 was  $\sim 0.3$ . The lower CE was probably due to the increased particle bounce caused by the sodium chloride seed particles. For the low-aerosol-yield experiments which used the same seed particles as in Exp. 1, a collection efficiency of 0.5 was applied.

### **3. Estimation of HPTMF vapor pressure and chamber wall loss**

Currently there is no reported experimentally measured saturation vapor pressure of HPTMF,  $C_{\text{HPTMF}}$ , under room temperature. Here,  $C_{\text{HPTMF}}$  is estimated using two methods. In the first method, the pure component vapor pressure of HPTMF is estimated by based on Compernelle *et al.* (Compernelle *et al.*, 2011) calculated by UManSysProp (<http://umansysprop.seaes.manchester.ac.uk/>). The estimated  $C_{\text{HPTMF}}$  is  $\sim 1 \times 10^8 \mu\text{g m}^{-3}$ . In the second method,  $C_{\text{HPTMF}}$  is estimated based on the vapor pressure of DMS which is  $\sim 500 \text{ mmHg}$  at room temperature (NIST webBook). The addition of the aldehyde group and the hydroperoxide group are expected to lower the vapor pressure by  $\sim 1$  and  $\sim 2.2$  decades, respectively (Capouet and Muller, 2006; Pankow and Asher, 2008). Thus,  $C_{\text{HPTMF}}$  is estimated to be on the order of  $1 \times 10^6 \mu\text{g m}^{-3}$ . Both methods suggest that

$C_{\text{HPMTF}}$  is at least two orders of magnitudes greater than the equivalent organic mass of the chamber wall,  $C_w$ , which is on the order of  $1 \times 10^4 \mu\text{g m}^{-3}$  (Krechmer et al., 2016). Therefore, only a very small amount ( $\sim 1\%$  or less) of HPTMF is expected to be deposited onto the chamber wall under dry condition.

#### 4. Determination of $k_{\text{isom}}$ of $\text{CH}_3\text{SCH}_2\text{OO}$

In Exp.3, the oxidation was initiated by  $\text{H}_2\text{O}_2$  photolysis with 3 ppb of NO in the chamber. Later, different amounts of HONO or NO was injected into the chamber several times to perturb the chemistry of the  $\text{RO}_2$  radicals, and in particular decreasing its  $\tau_{\text{bi}}$ . Each perturbation lasted for  $\sim 10$  minutes, and the branching fraction of the  $\text{CH}_3\text{SCH}_2\text{OO}$  radicals that undergo isomerization,  $f_{\text{isom}}$ , was determined by using the yield of HPMTF in the abstraction channel from the measurements:

$$Y_{\text{HPMTF}} = f_{\text{isom}} = \frac{a_{\text{cal}} \times \Delta\text{HPMTF}}{\Delta\text{DMS} \times f_{\text{abs}}}. \quad \text{Eq. S1}$$

In Figure S7 in which the loss of HPMTF via OH oxidation is not considered,  $\Delta\text{HPMTF}$  is simply the change in the measured HPMTF concentration,  $\Delta\text{HPMTF}_{\text{meas}}$ . When taking loss by OH oxidation into account,  $\Delta\text{HPMTF} = \Delta\text{HPMTF}_{\text{meas}} + \int k_{\text{HPMTF}+\text{OH}} \times \Delta[\text{HPMTF}][\text{OH}] dt$ . Here,  $2.1 \times 10^{-11} \text{ cm}^3 \text{ molec}^{-1} \text{ s}^{-1}$  is used as  $k_{\text{HPMTF}+\text{OH}}$  derived from our measurements.

$f_{\text{isom}}$  is also determined by the rate coefficient of the isomerization channel and the bimolecular channels of the  $\text{CH}_3\text{SCH}_2\text{OO}$  radical:

$$f_{\text{isom}} = \frac{k_{\text{isom}}}{k_{\text{isom}} + k_{\text{bi}}} \quad \text{Eq. S2}$$

Here,  $k_{\text{bi}}$  is the bimolecular rate of  $\text{CH}_3\text{SCH}_2\text{OO}$  with  $\text{HO}_2$  and NO, derived from

$$k_{\text{bi}} = \frac{1}{\tau_{\text{bi}}} = k_{\text{HO}_2}[\text{HO}_2] + k_{\text{NO}}[\text{NO}] \quad \text{Eq. S3}$$

Taken together,  $k_{\text{isom}}$  can be estimated by fitting the following equation from the perturbations:

$$Y_{\text{HPMTF}} = \frac{1}{a_{\text{cal}}} \times \frac{k_{\text{isom}}}{k_{\text{isom}} + \frac{1}{\tau_{\text{bi}}}} \quad \text{Eq. S4}$$

Here,  $f_{\text{abs}} = 0.65$ , which is based on the branching fraction of the abstraction channel under the temperature in this work (Barnes et al., 2006). A calibration factor,  $a_{\text{cal}}$ , was included as a parameter to account for the calibration uncertainty of HPMTF in the measurements; however its value has no impact on the inflection point of the fitted curve in Figure 3a. The initial concentration of NO in each perturbation was constrained by the measurements, and the subsequent change of NO was derived from F0AM simulations.  $[\text{HO}_2]$  was also derived from F0AM simulations, and  $k_{\text{HO}_2}$  and  $k_{\text{NO}}$  were taken from MCM\_V3.3.1 (Jenkin et al., 1997; Saunders et al., 2003).  $[\text{NO}]$  and  $[\text{HO}_2]$  were averaged for each of the 10-minute period.

#### 5. Other supporting figures



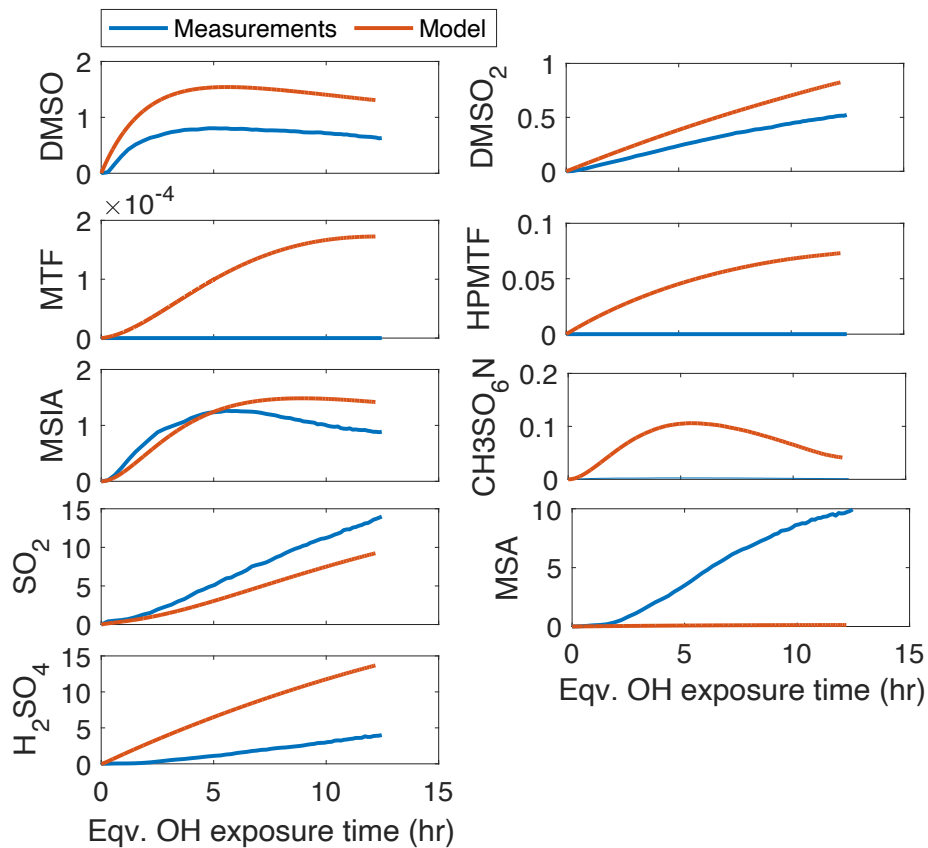

Figure S3: Measurement-model comparison of individual sulfur-containing products under the high-NO condition (Exp. 1). Concentrations (y axis) are in ppb S.

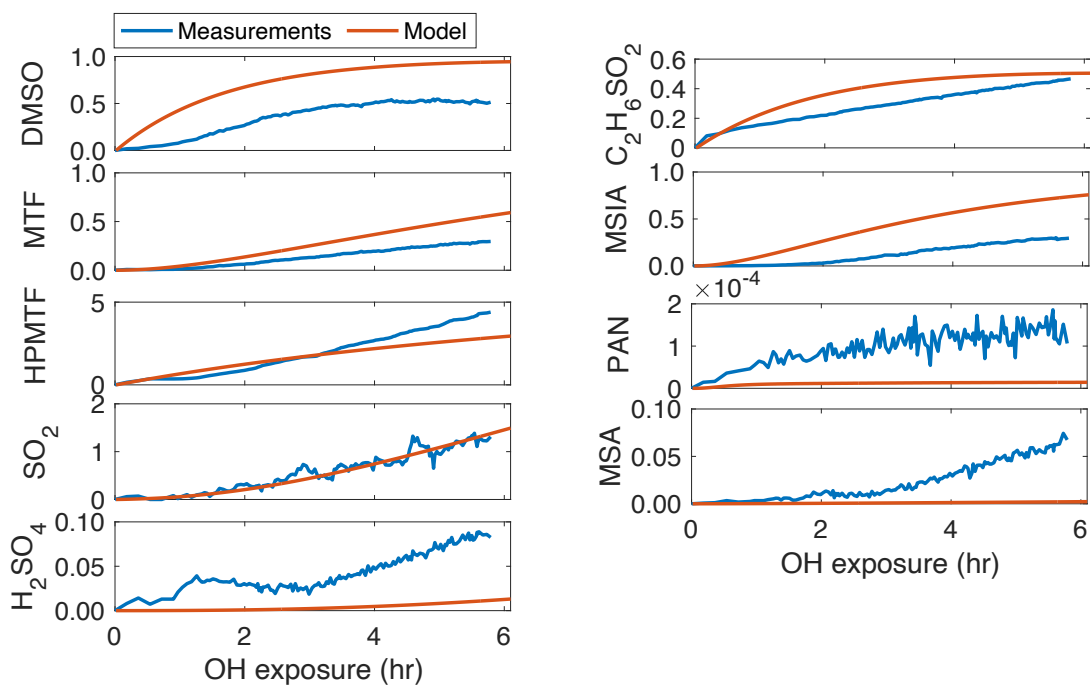

Figure S4: Measurement-model comparison of individual sulfur products from DMS-<sup>12</sup>C oxidation under the low-NO condition (Exp. 2a). Concentrations (y axis) are in ppb S.

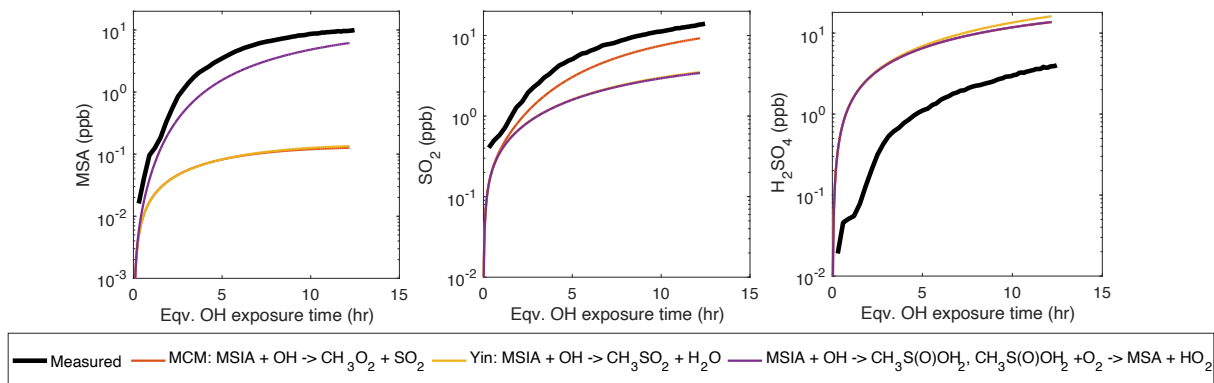

Figure S5: Measured and modeled MSA, SO<sub>2</sub> and sulfuric acid concentrations in different scenarios of MSIA reaction rate constants for Exp. 1 (high-NO). Black: measured concentrations in Exp. 1. Red: modeled concentrations using default MCM mechanism of MSIA + OH → CH<sub>3</sub>O<sub>2</sub> + SO<sub>2</sub> with  $k_{\text{MSIA+OH}} = 9 \times 10^{-11} \text{ cm}^3 \text{ molec}^{-1} \text{ s}^{-1}$ . Yellow: modeled concentrations using MSIA + OH abstraction reaction forming CH<sub>3</sub>SO<sub>2</sub> + H<sub>2</sub>O with  $k_{\text{MSIA+OH}} = 1.6 \times 10^{-11} \text{ cm}^3 \text{ molec}^{-1} \text{ s}^{-1}$  used in Yin et al. (1990). Purple: modeled concentrations using MSIA + OH → CH<sub>3</sub>S(O)(OH)<sub>2</sub> with  $k = 9 \times 10^{-11} \text{ cm}^3 \text{ molec}^{-1} \text{ s}^{-1}$  and CH<sub>3</sub>S(O)(OH)<sub>2</sub> + O<sub>2</sub> → MSA + HO<sub>2</sub> with  $k = 1.3 \times 10^{-12} \times \exp(-330/T) \times 0.21 \times M$  (taken from MCM from HSO<sub>3</sub> + O<sub>2</sub> → SO<sub>3</sub> + HO<sub>2</sub>).

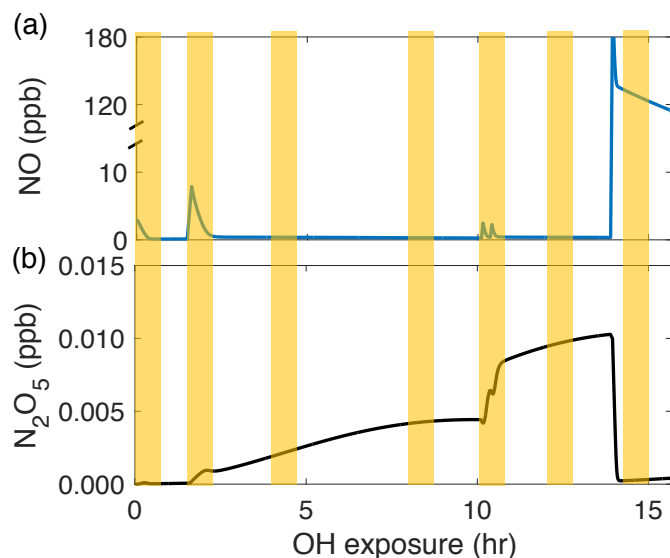

Figure S6: Time series of (a) NO and (b) N<sub>2</sub>O<sub>5</sub> in Experiment 3. The initial concentration of NO of every injection was constrained by the measurements and the remaining decay was predicted by the model (there were large measurement uncertainties in the sub-ppb range in the NO-NO<sub>2</sub>-NO<sub>x</sub> analyzer). Concentration of N<sub>2</sub>O<sub>5</sub> is from the model. Yellow stripes indicate the 10-minute periods used in  $k_{\text{isom}}$  estimation (Figure 3a). Increases in N<sub>2</sub>O<sub>5</sub> can lead to interferences in the HPMTF-<sup>12</sup>C<sub>2</sub> signal in the I-CIMS spectra.

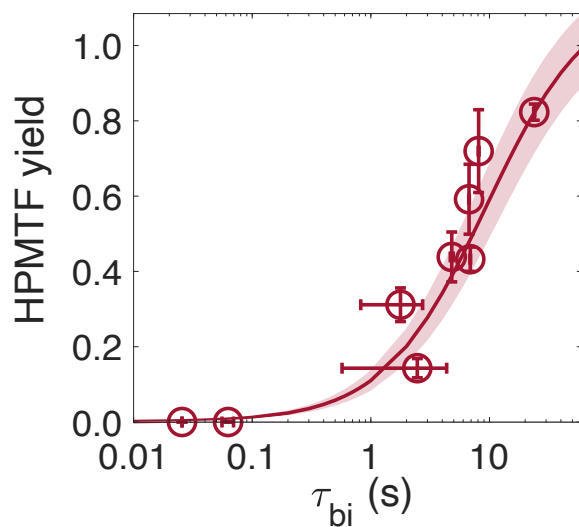

Figure S7: Yields of HPMTF- $^{13}\text{C}_2$  as a function of  $\text{RO}_2$  bimolecular lifetime without considering HPMTF + OH. The derived fitted  $k_{\text{isom}} = 0.11 \pm 0.02 \text{ s}^{-1}$ .

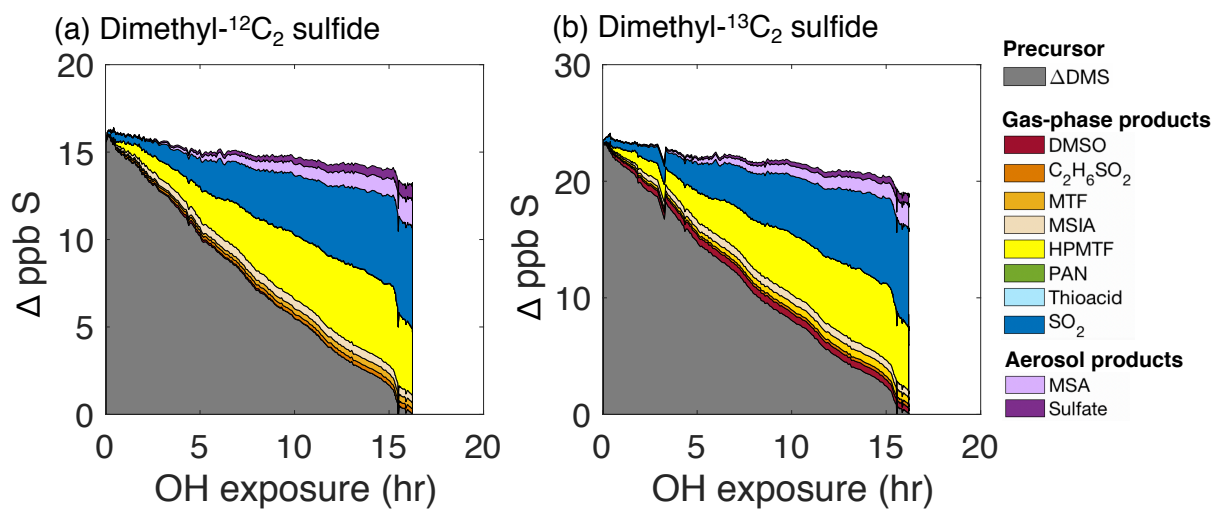

Figure S8: Measurements of total sulfur distribution of (a)  $\text{DMS-}^{12}\text{C}_2$  and (b)  $\text{DMS-}^{13}\text{C}_2$  in Exp. 3.

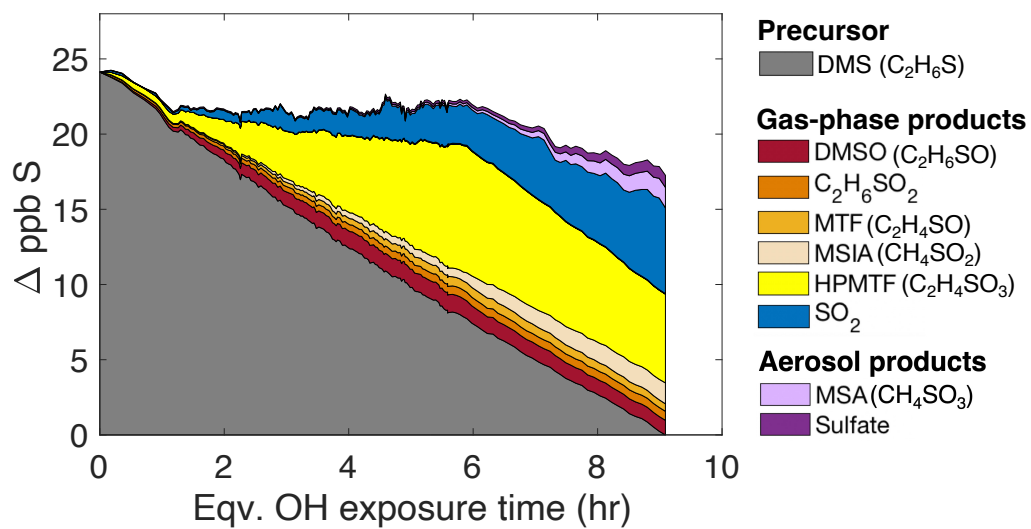

Figure S9: Measured total sulfur distribution for the entire Exp. 2 (DMS- $^{12}C_2$  + DMS- $^{13}C_2$ ).

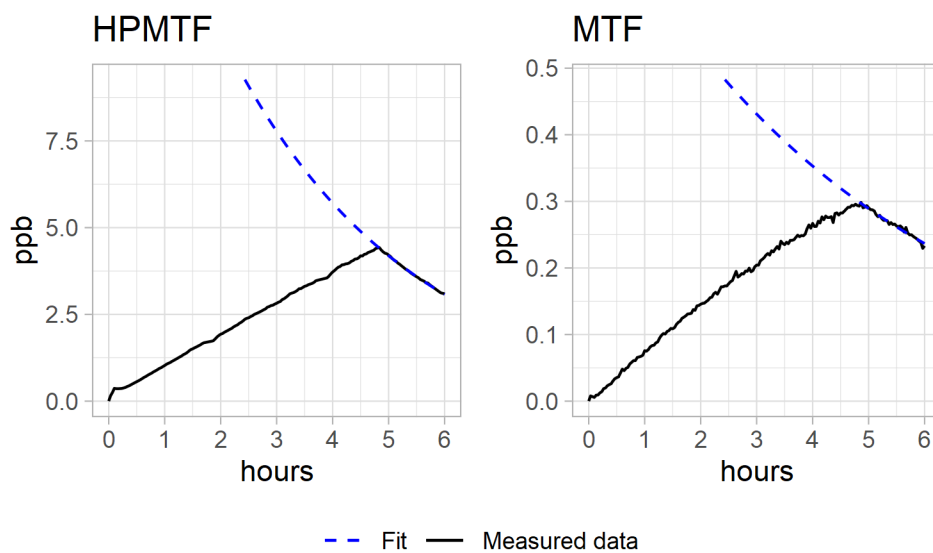

Figure S10: Fittings of HPMTF and MTF decays in Exp. 2b to derive  $k_{OH+HPMTF}$  and  $k_{OH+MTF}$ .

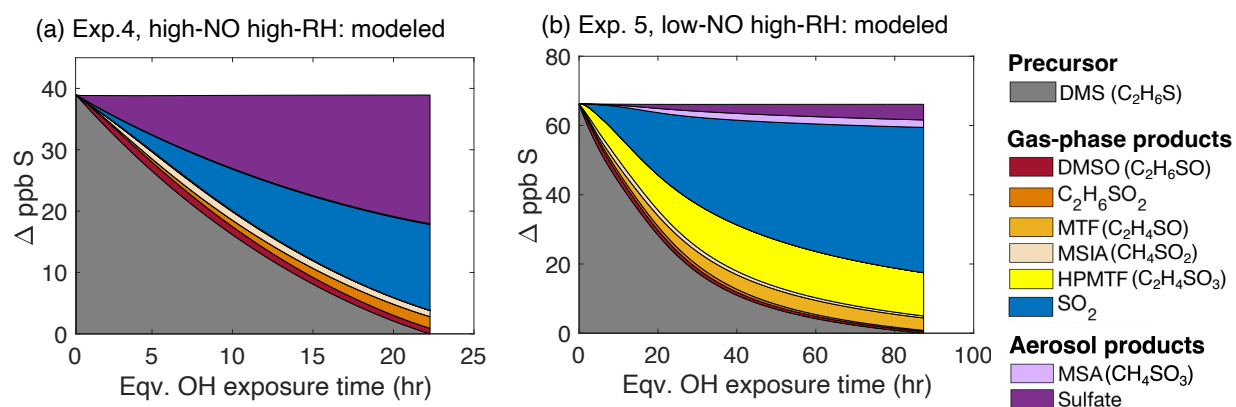

Figure S11: (a) Modeled product distribution of Exp. 4. (b) Modeled product distribution of Exp. 5.

## References:

- Barnes, I., Hjorth, J. and Mihalopoulos, N.: Dimethyl sulfide and dimethyl sulfoxide and their oxidation in the atmosphere, *Chem. Rev.*, 106, 940–975, <https://doi.org/10.1021/cr020529+>, 2006.
- Capouet, M., and J-F. Müller.: A group contribution method for estimating the vapour pressures of  $\alpha$ -pinene oxidation products, *Atmos. Chem. Phys.*, 6, 1455–1467, <https://doi.org/10.5194/acp-6-1455-2006>, 2006.
- Compernelle S., Ceulemans, K., Müller, J.F.: EVAPORATION: a new vapor pressure estimation method for organic molecules including non-additivity and intramolecular interactions, *Atmos. Chem. Phys.*, 11, 9431-9450, <https://doi.org/10.5194/acp-11-9431-2011>, 2011.
- Guo, H., Campuzano-Jost, P., Nault, B. A., Day, D. A., Schroder, J. C., Kim, D., Dibb, J. E., Dollner, M., Weinzierl, B., and Jimenez, J. L.: The importance of size ranges in aerosol instrument intercomparisons: a case study for the Atmospheric Tomography Mission, *Atmos. Meas. Tech.*, 14, 3631–3655, <https://doi.org/10.5194/amt-14-3631-2021>, 2021.
- Hodshire, A. L., Campuzano-Jost, P., Kodros, J. K., Croft, B., Nault, B. A., Schroder, J. C., Jimenez, J. L. and Pierce, J. R.: The potential role of methanesulfonic acid (MSA) in aerosol formation and growth and the associated radiative forcings, *Atmos. Chem. Phys.*, 19, 3137–3160, <https://doi.org/10.5194/acp-19-3137-2019>, 2019.
- Huang, S., Poulain, L., Pinxteren, D. Van, Pinxteren, M. Van, Wu, Z., Herrmann, H. and Wiedensohler, A.: Latitudinal and Seasonal Distribution of Particulate MSA over the Atlantic using a Validated Quantification Method with HR-ToF-AMS, *Environm. Sci. & Technol.*, 51, 418–426, <https://doi.org/10.1021/acs.est.6b03186>, 2017.
- Isaacman-Vanwertz, G., Massoli, P., O'Brien, R., Lim, C., Franklin, J. P., Moss, J. A., Hunter, J. F., Nowak, J. B., Canagaratna, M. R., Misztal, P. K., Arata, C., Roscioli, J. R., Herndon, S. T., Onasch, T. B., Lambe, A. T., Jayne, J. T., Su, L., Knopf, D. A., Goldstein, A. H., Worsnop, D. R. and Kroll, J. H.: Chemical evolution of atmospheric organic carbon over multiple generations of oxidation, *Nat. Chem.*, 10, 462–468, <https://doi.org/10.1038/s41557-018-0002-2>, 2018.
- Jenkin, M. E., Saunders, S. M. and Pilling, M. J.: The tropospheric degradation of volatile organic compounds: a protocol for mechanism development, *Atmos. Environ.*, 31, 81–104, 1997.

Krechmer, E. J., Lopez-Hilfiker, F., Koss, A., Hutterli, M., Stoermer, C., Deming, B., Kimmel, J., Warneke, C., Holzinger, R., Jayne, J., Worsnop, D., Fuhrer, K., Gonin, M. and Gouw, J. De: Evaluation of a new reagent-ion source and focusing ion-molecule reactor for use in proton-transfer-reaction mass spectrometry, *Anal. Chem.*, 90, 12011–12018, <https://doi.org/10.1021/acs.analchem.8b02641>, 2018.

Krechmer, E. J., Pagonis, D., Ziemann, P. J., Jimenez, J. L.: Quantification of gas-wall partitioning in Teflon environmental chambers using rapid bursts of low-volatility oxidized species generated in situ, *Environ. Sci. Technol.*, 50, 5757–5765, <https://doi.org/10.1021/acs.est/6b00606>, 2016.

Lopez-Hilfiker, F. D., Iyer, S., Mohr, C., Lee, B. H., D'ambro, E. L., Kurtén, T. and Thornton, J. A.: Constraining the sensitivity of iodide adduct chemical ionization mass spectrometry to multifunctional organic molecules using the collision limit and thermodynamic stability of iodide ion adducts, *Atmos. Meas. Tech.*, 9, 1505–1512, <https://doi.org/10.5194/amt-9-1505-2016>, 2016.

McManus, J.B., Zahniser, M.S., Nelson, D.D., McGovern, R.M., Agnese, M. and Brown, W.F.: Compact Quantum Cascade Laser Instrument for High Precision Trace Gas Measurements. In *Optical Instrumentation for Energy and Environmental Applications* (p. EThC2). Optica Publishing Group, <https://doi.org/10.1364/E2.2011.EThC2>, 2011, November.

McManus, J.B., Keabian, P.L. and Zahniser, M.S.: Astigmatic mirror multipass absorption cells for long-path-length spectroscopy. *Applied Optics*, 34, 3336–3348, 1995.

Novak, G. A., Fite, C. H., Holmes, C. D., Veres, P. R., Neuman, J. A., Faloon, I., Thornton, J. A., Wolfe, G. M., Vermeuel, M. P., Jernigan, C. M., Peischl, J., Ryerson, T. B., Thompson, C. R., Bourgeois, I., Warneke, C., Gkatzelis, G. I., Coggon, M. M., Sekimoto, K., Bui, T. P., Dean-Day, J., Diskin, G. S., DiGangi, J. P., Nowak, J. B., Moore, R. H., Wiggins, E. B., Winstead, E. L., Robinson, C., Thornhill, K. L., Sanchez, K. J., Hall, S. R., Ullmann, K., Dollner, M., Weinzierl, B., Blake, D. R. and Bertram, T. H.: Rapid cloud removal of dimethyl sulfide oxidation products limits SO<sub>2</sub> and cloud condensation nuclei production in the marine atmosphere, *Proc. Natl. Acad. Sci.*, 118, <https://doi.org/10.1073/PNAS.2110472118>, 2021.

Pankow, J. F. and Asher, W. E.: SIMPOL.1: a simple group contribution method for predicting vapor pressures and enthalpies of vaporization of multifunctional organic compounds, *Atmos. Chem. Phys.*, 8, 2773–2796, <https://doi.org/10.5194/acp-8-2773-2008>, 2008.

Saunders, S. M., Jenkin, M. E., Derwent, R. G. and Pilling, M. J.: Protocol for the development of the Master Chemical Mechanism, MCM v3 (Part A): Tropospheric degradation of non-aromatic volatile organic compounds, *Atmos. Chem. Phys.*, 3, 161–180, <https://doi.org/10.5194/acp-3-161-2003>, 2003.

Scholz, W., Shen, J., Aliaga, D., Wu, C., Carbone, S., Moreno, I., Zha, Q., Huang, W., Heikkinen, L., Jaffrezo, J.L. and Uzu, G., Measurement Report: Long-range transport and fate of DMS-oxidation products in the free troposphere derived from observations at the high-altitude research station Chacaltaya (5240 m asl) in the Bolivian Andes. *EGUsphere* [preprint], <https://doi.org/10.5194/egusphere-2022-887>, 2022.

Vermeuel, M. P., Novak, G. A., Jernigan, C. M. and Bertram, T. H.: Diel Profile of Hydroperoxymethyl Thioformate: Evidence for Surface Deposition and Multiphase Chemistry, *Environ. Sci. Technol.*, 54, 12521–12529, <https://doi.org/10.1021/acs.est.0c04323>, 2020.

Wang, N., Jorga, S. D., Pierce, J. R., Donahue, N. M. and Pandis, S. N.: Particle wall-loss

correction methods in smog chamber experiments, *Atmos. Meas. Tech.*, 11, 6577–6588, <https://doi.org/10.5194/amt-11-6577-2018>, 2018.

Wu, R., Wang, S. and Wang, L.: New mechanism for the atmospheric oxidation of dimethyl sulfide. The importance of intramolecular hydrogen shift in a  $\text{CH}_3\text{SCH}_2\text{OO}$  radical, *J. Phys. Chem. A*, 119, 112–117, <https://doi.org/10.1021/jp511616j>, 2015.

Ye, Q., Goss, M. B., Isaacman-Vanwertz, G., Zaytsev, A., Massoli, P., Lim, C., Croteau, P., Canagaratna, M., Knopf, D. A., Keutsch, F. N., Heald, C. L. and Kroll, J. H.: Organic Sulfur Products and Peroxy Radical Isomerization in the OH Oxidation of Dimethyl Sulfide, *ACS Earth Sp. Chem.*, 5, 2013–2020, <https://doi.org/10.1021/acsearthspacechem.1c00108>, 2021.

Yin, F., Grosjean, D. and Seinfeld, J. H.: Photooxidation of Dimethyl Sulfide and Dimethyl Disulfide. I: Mechanism Development, *J. Atmos. Chem.*, 11, 309–365, 1990.

Zaytsev, A., Breitenlechner, M., Koss, A. R., Lim, C. Y., Rowe, J. C., Kroll, J. H. and Keutsch, F. N.: Using collision-induced dissociation to constrain sensitivity of ammonia chemical ionization mass spectrometry ( $\text{NH}_4^+$  CIMS) to oxygenated volatile organic compounds, *Atmos. Meas. Tech.*, 12, 1861–1870, <https://doi.org/10.5194/amt-12-1861-2019>, 2019.

Zorn, S. R., Drewnick, F., Schott, M., Hoffmann, T. and Borrmann, S.: Characterization of the South Atlantic marine boundary layer aerosol using an aerodyne aerosol mass spectrometer, *Atmos. Chem. Phys.*, 8, 4711–4728, <https://doi.org/10.5194/acp-8-4711-2008>, 2008.
